# Supplementary material
Source: publisher figshare collection journal article supplement (https://karger.figshare.com/ndownloader/files/20219586)

Study No.: MET-T001

Figure S4 Swimmer Plot of OS in c-MET Low Subjects

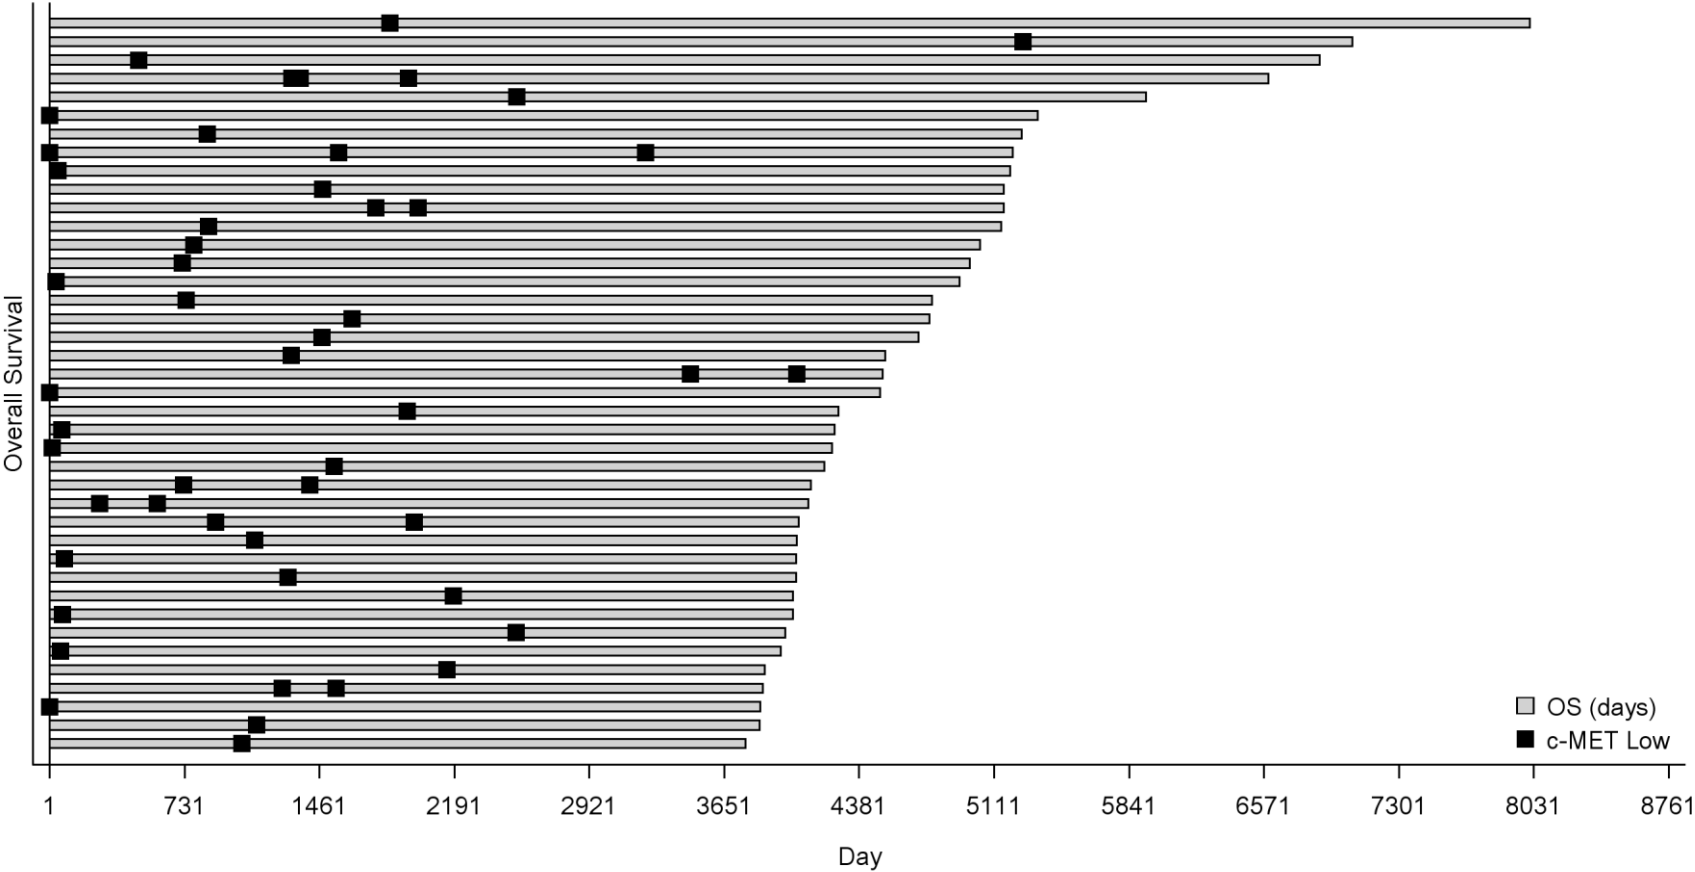

Study No.: MET-T001

Figure 4-2 Swimmer Plot of OS in c-MET Low Subjects

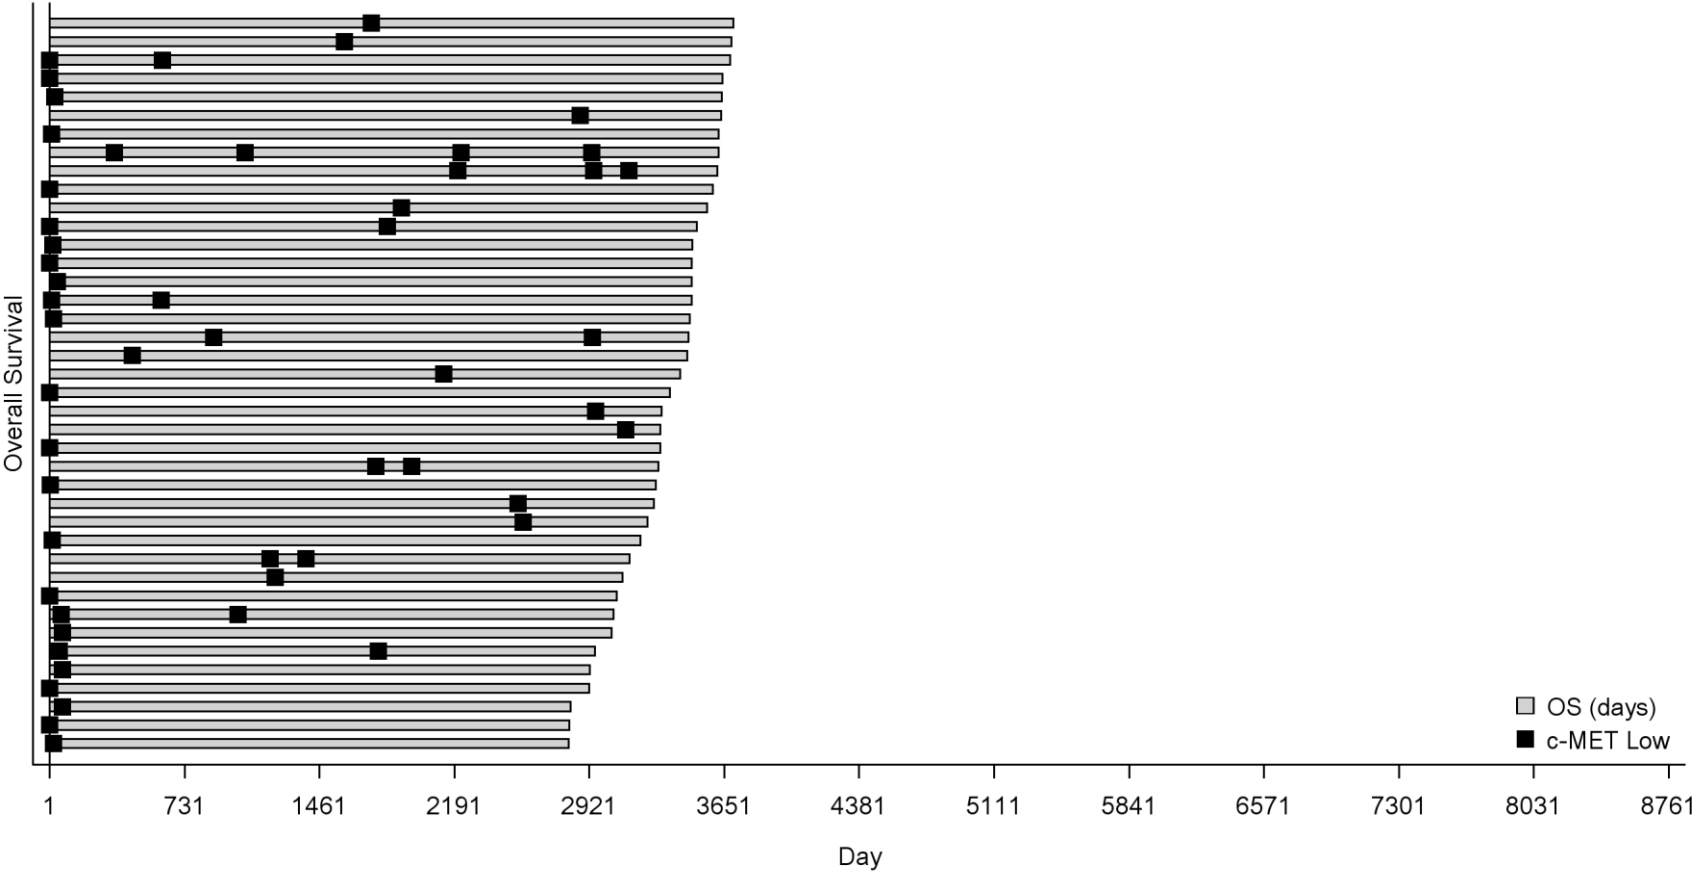

Study No.: MET-T001

Figure 4-2 Swimmer Plot of OS in c-MET Low Subjects

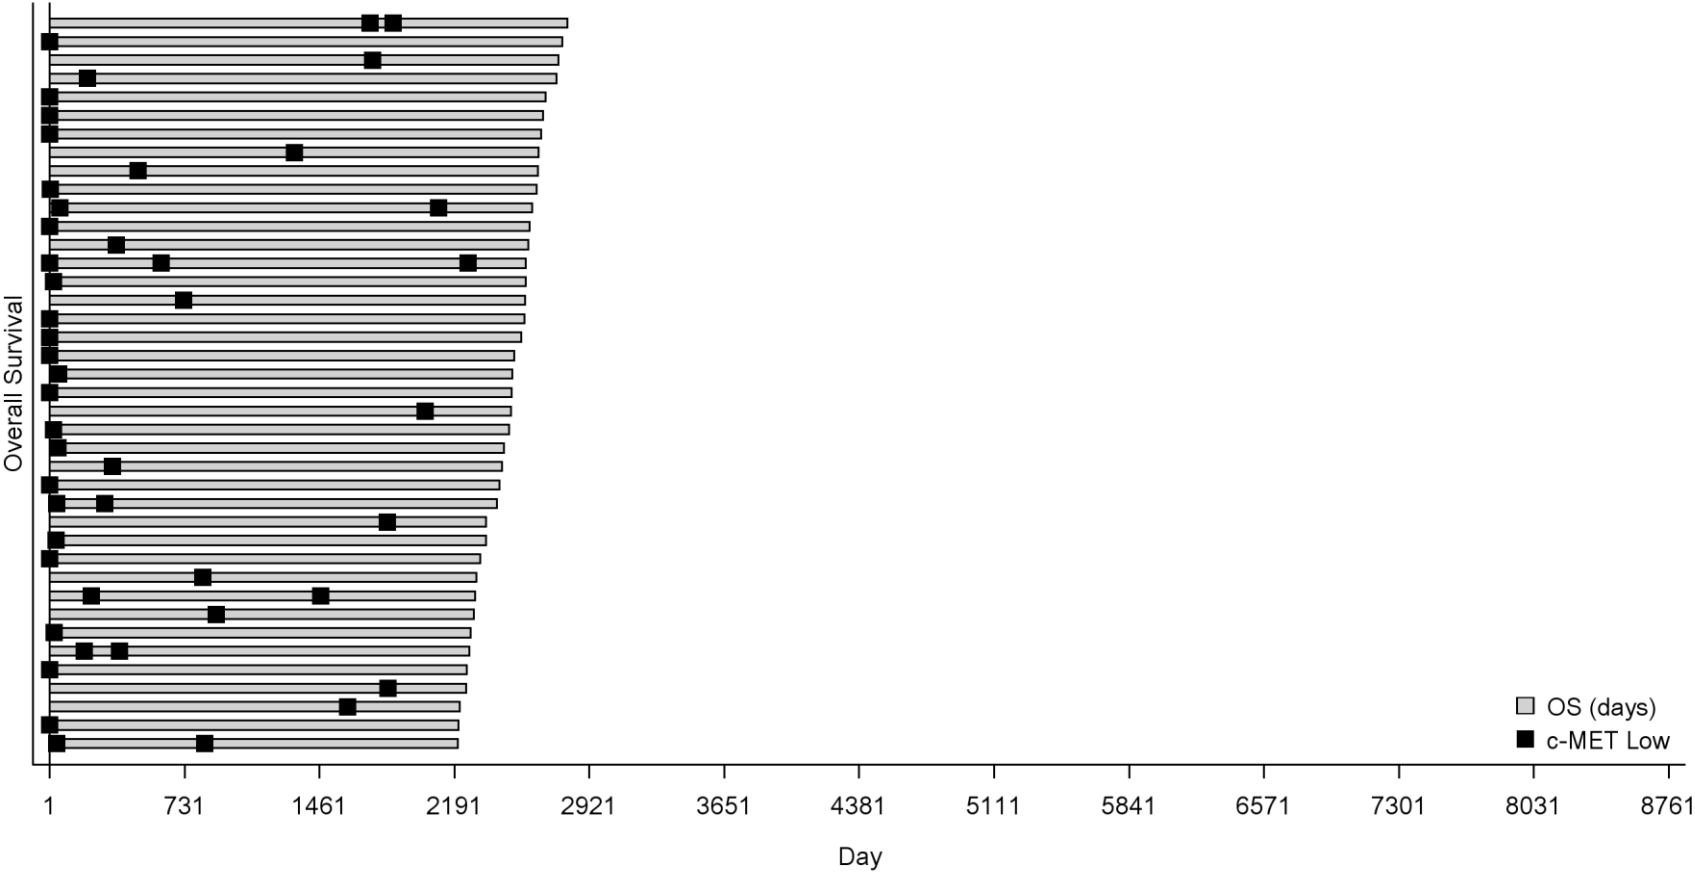

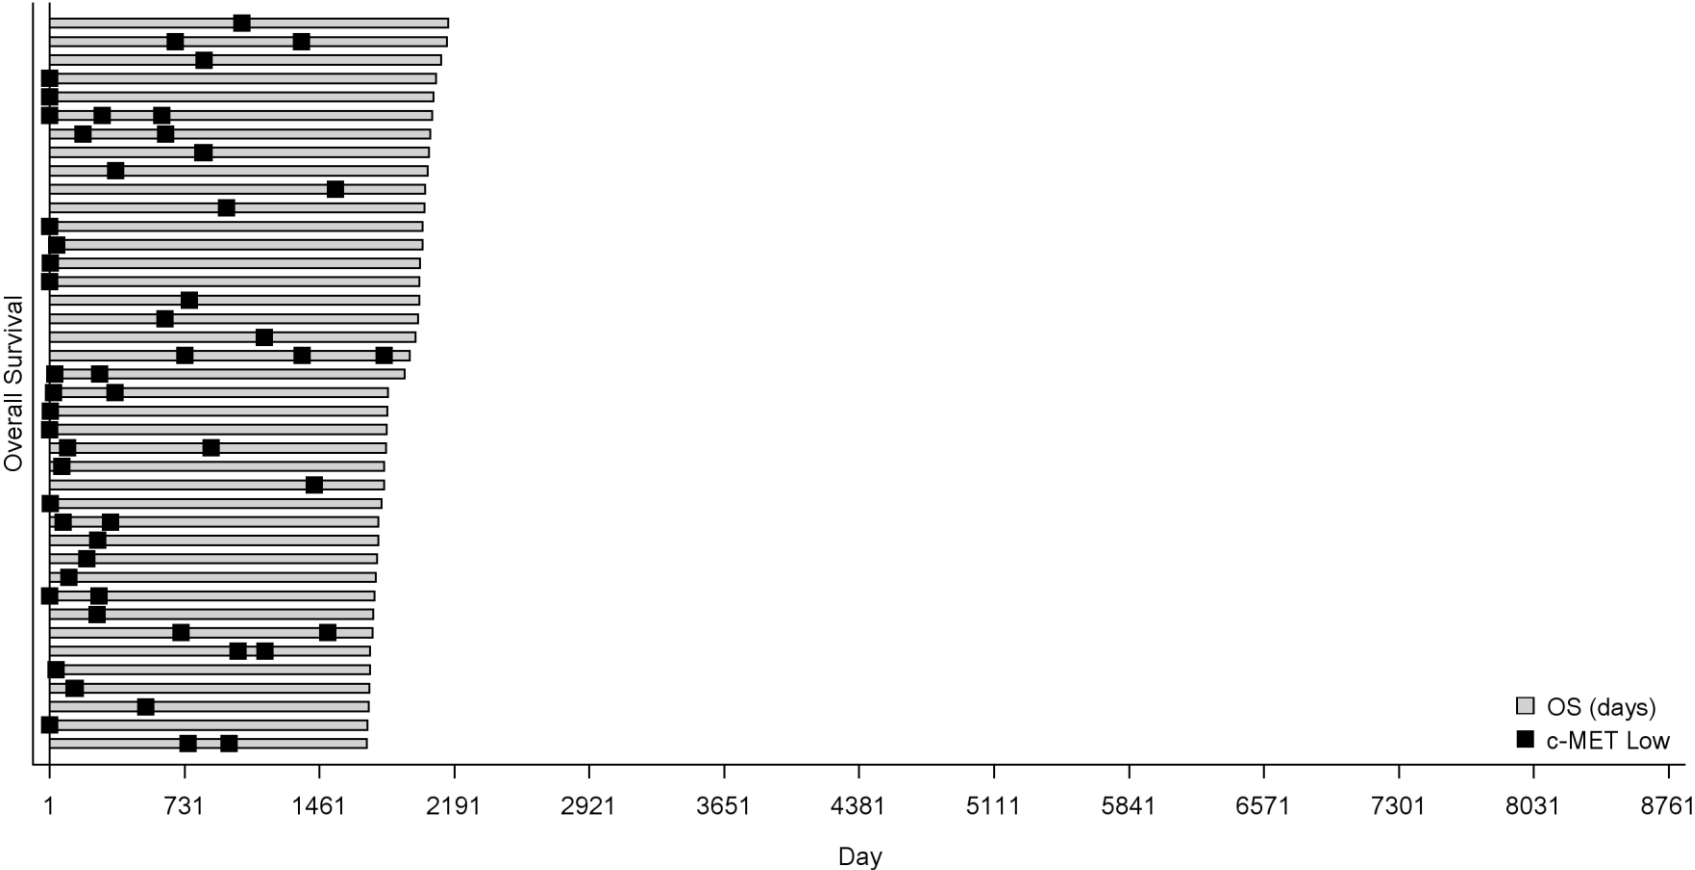

Study No.: MET-T001

Figure 4-2 Swimmer Plot of OS in c-MET Low Subjects

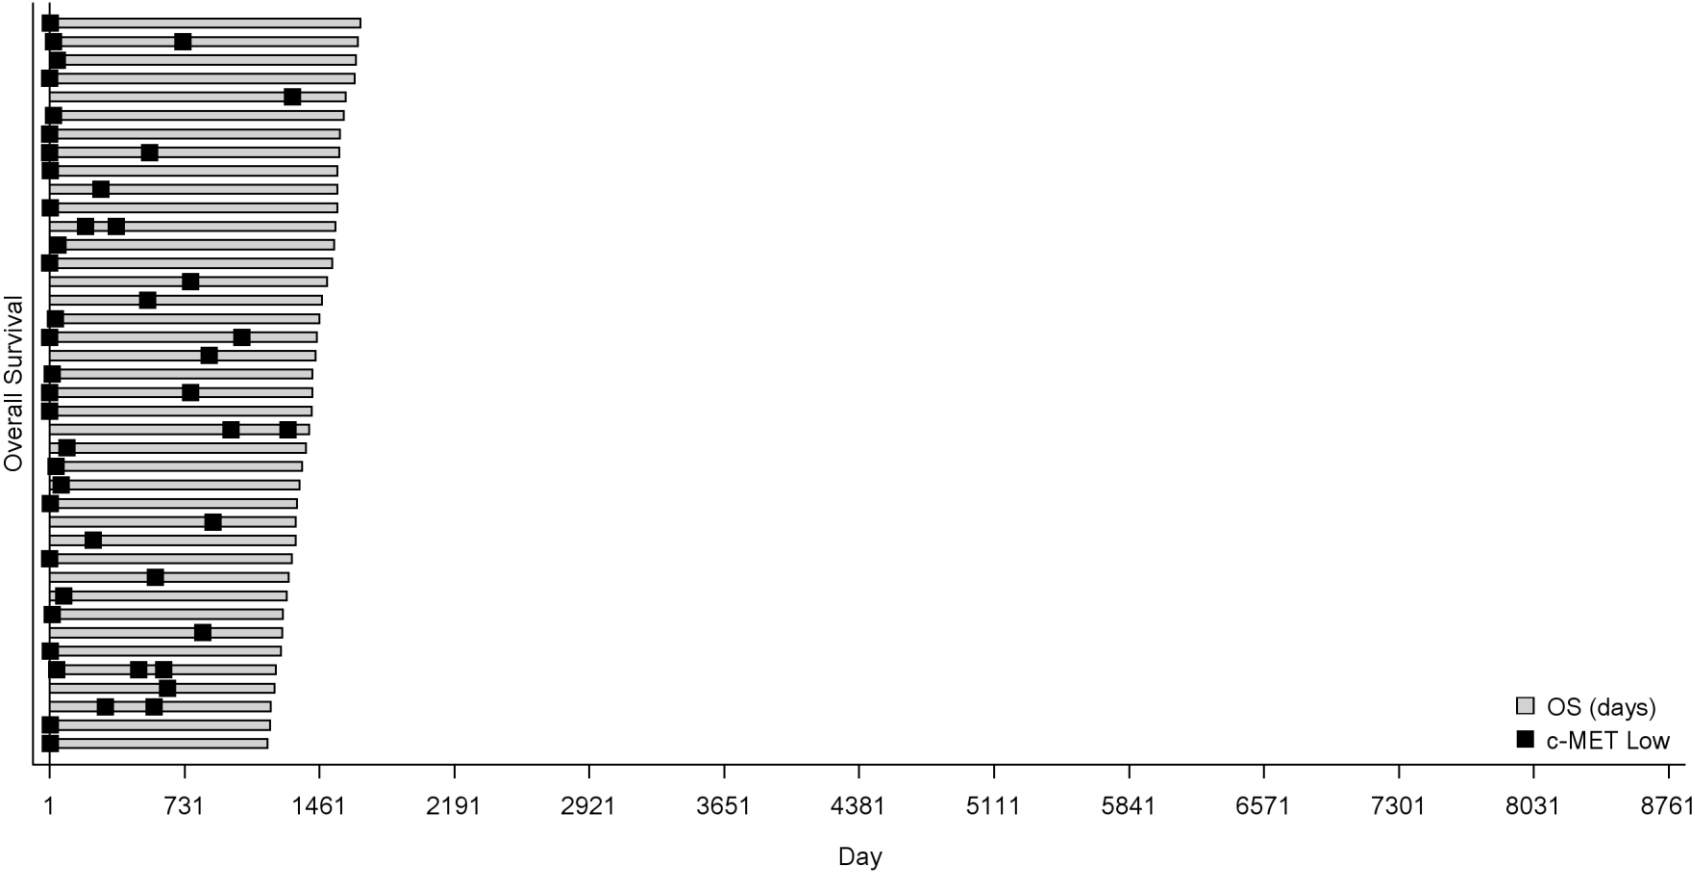

Study No.: MET-T001

Figure 4-2 Swimmer Plot of OS in c-MET Low Subjects

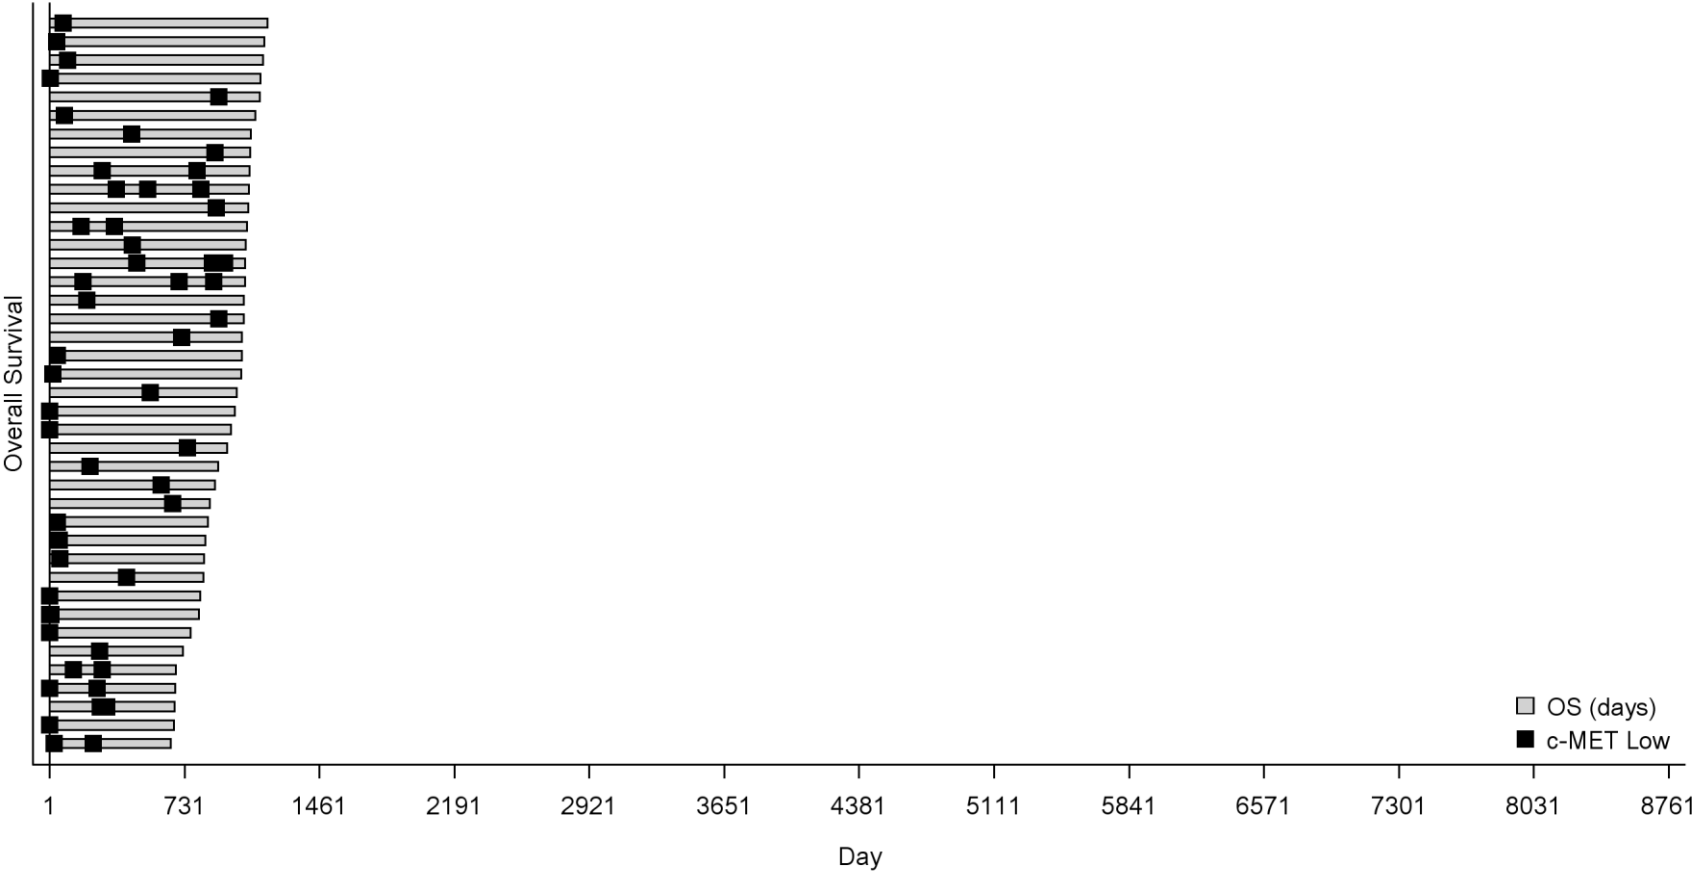

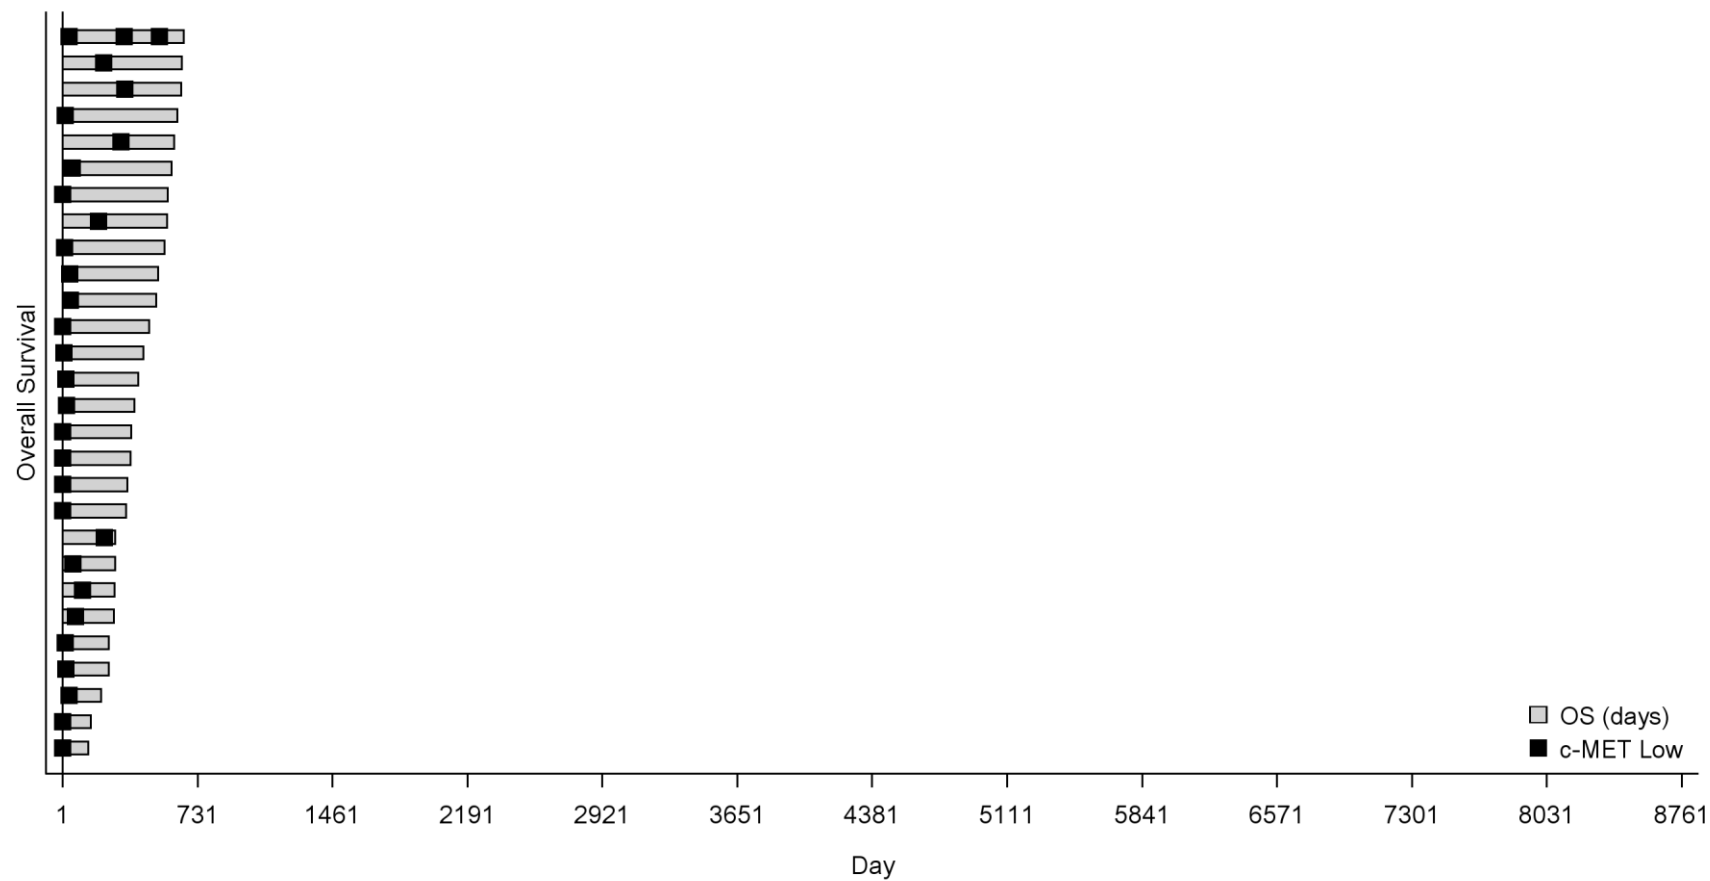

Supplement: Supplementary file 1 [file 20219586]
